# Supplementary material for: Hospital-Onset Bloodstream Infections Caused by Eight Sentinel Bacteria: A Nationwide Study in Israel, 2018–2019
Source: MDPI journal article supplement (doi:10.3390/microorganisms10051009), 2022-05-11
Supplement: s1 [file s1]

**Table S1.** STROBE Statement.

|                      | Item No. | Recommendation                                                                                                                                                                     | Where Found in Manuscript                                    |
|----------------------|----------|------------------------------------------------------------------------------------------------------------------------------------------------------------------------------------|--------------------------------------------------------------|
| Title and abstract   | 1        | (a) Indicate the study’s design with a commonly used term in the title or the abstract                                                                                             | Methods section of abstract                                  |
|                      |          | (b) Provide in the abstract an informative and balanced summary of what was done and what was found                                                                                | Methods and results sections of abstract                     |
| Introduction         |          |                                                                                                                                                                                    |                                                              |
| Background/rationale | 2        | Explain the scientific background and rationale for the investigation being reported                                                                                               | Introduction, first to third paragraphs                      |
| Objectives           | 3        | State specific objectives, including any prespecified hypotheses                                                                                                                   | Introduction, fourth paragraph                               |
| Methods              |          |                                                                                                                                                                                    |                                                              |
| Study design         | 4        | Present key elements of study design early in the paper                                                                                                                            | Methods section                                              |
| Setting              | 5        | Describe the setting, locations, and relevant dates, including periods of recruitment, exposure, follow-up, and data collection                                                    | Methods, Study setting and participants, and Data collection |
| Participants         | 6        | (a) Cohort study—Give the eligibility criteria, and the sources and methods of selection of participants. Describe methods of follow-up                                            | Methods, Data collection and Laboratory methods              |
|                      |          | Case-control study—Give the eligibility criteria, and the sources and methods of case ascertainment and control selection. Give the rationale for the choice of cases and controls |                                                              |
|                      |          | Cross-sectional study—Give the eligibility criteria, and the sources and methods of selection of participants                                                                      |                                                              |
|                      |          | (b) Cohort study—For matched studies, give matching criteria and number of exposed and unexposed                                                                                   | NA                                                           |

|                              |    |                                                                                                                                                                                      |                                                        |
|------------------------------|----|--------------------------------------------------------------------------------------------------------------------------------------------------------------------------------------|--------------------------------------------------------|
|                              |    | <i>Case-control study</i> —For matched studies, give matching criteria and the number of controls per case                                                                           |                                                        |
| Variables                    | 7  | Clearly define all outcomes, exposures, predictors, potential confounders, and effect modifiers. Give diagnostic criteria, if applicable                                             | Methods, Definitions                                   |
| Data sources/<br>measurement | 8  | For each variable of interest, give sources of data and details of methods of assessment (measurement). Describe comparability of assessment methods if there is more than one group | Methods, Definitions                                   |
| Bias                         | 9  | Describe any efforts to address potential sources of bias                                                                                                                            | NA                                                     |
| Study size                   | 10 | Explain how the study size was arrived at                                                                                                                                            | NA                                                     |
| Quantitative<br>variables    | 11 | Explain how quantitative variables were handled in the analyses. If applicable, describe which groupings were chosen and why                                                         | NA                                                     |
| Statistical methods          | 12 | (a) Describe all statistical methods, including those used to control for confounding                                                                                                | Methods, Incidence, Mortality and Statistical analysis |
|                              |    | (b) Describe any methods used to examine subgroups and interactions                                                                                                                  | Methods, Statistical analysis                          |
|                              |    | (c) Explain how missing data were addressed                                                                                                                                          | NA                                                     |
|                              |    | (d) <i>Cohort study</i> —If applicable, explain how loss to follow-up was addressed                                                                                                  | NA                                                     |
|                              |    | <i>Case-control study</i> —If applicable, explain how matching of cases and controls was addressed                                                                                   |                                                        |
|                              |    | <i>Cross-sectional study</i> —If applicable, describe analytical methods taking account of sampling strategy                                                                         |                                                        |
|                              |    | (e) Describe any sensitivity analyses                                                                                                                                                | NA                                                     |

## Results

|                   |    |                                                                                                                                                                                                              |                                                    |
|-------------------|----|--------------------------------------------------------------------------------------------------------------------------------------------------------------------------------------------------------------|----------------------------------------------------|
| Participants      | 13 | (a) Report numbers of individuals at each stage of study—eg numbers potentially eligible, examined for eligibility, confirmed eligible, included in the study, completing follow-up, and analysed            | Results, first paragraph,                          |
|                   |    | (b) Give reasons for non-participation at each stage                                                                                                                                                         | Results, "Data on mortality"                       |
|                   |    | (c) Consider use of a flow diagram                                                                                                                                                                           | NA                                                 |
| Descriptive data  | 14 | (a) Give characteristics of study participants (eg demographic, clinical, social) and information on exposures and potential confounders                                                                     | Table 1                                            |
|                   |    | (b) Indicate number of participants with missing data for each variable of interest                                                                                                                          | See 13                                             |
|                   |    | (c) <i>Cohort study</i> —Summarise follow-up time (eg, average and total amount)                                                                                                                             | NA                                                 |
| Outcome data      | 15 | <i>Cohort study</i> —Report numbers of outcome events or summary measures over time                                                                                                                          | Tables 2 & 3                                       |
|                   |    | <i>Case-control study</i> —Report numbers in each exposure category, or summary measures of exposure                                                                                                         |                                                    |
|                   |    | <i>Cross-sectional study</i> —Report numbers of outcome events or summary measures                                                                                                                           |                                                    |
| Main results      | 16 | (a) Give unadjusted estimates and, if applicable, confounder-adjusted estimates and their precision (eg, 95% confidence interval). Make clear which confounders were adjusted for and why they were included | Tables 2 & 3                                       |
|                   |    | (b) Report category boundaries when continuous variables were categorized                                                                                                                                    | NA                                                 |
|                   |    | (c) If relevant, consider translating estimates of relative risk into absolute risk for a meaningful time period                                                                                             | NA                                                 |
| Other analyses    | 17 | Report other analyses done—eg analyses of subgroups and interactions, and sensitivity analyses                                                                                                               | NA                                                 |
| <b>Discussion</b> |    |                                                                                                                                                                                                              |                                                    |
| Key results       | 18 | Summarise key results with reference to study objectives                                                                                                                                                     | Discussion, first paragraph                        |
| Limitations       | 19 | Discuss limitations of the study, taking into account sources of potential bias or imprecision. Discuss both direction and magnitude of any potential bias                                                   | Discussion, "Some limitations should be discussed" |
| Interpretation    | 20 | Give a cautious overall interpretation of results considering objectives, limitations, multiplicity of analyses, results from similar studies, and other relevant evidence                                   | Discussion                                         |

---

|                          |    |                                                                                                                                                               |                                                            |
|--------------------------|----|---------------------------------------------------------------------------------------------------------------------------------------------------------------|------------------------------------------------------------|
| Generalisability         | 21 | Discuss the generalisability (external validity) of the study results                                                                                         | Discussion, 2 <sup>nd</sup> and 3 <sup>rd</sup> paragraphs |
| <b>Other information</b> |    |                                                                                                                                                               |                                                            |
| Funding                  | 22 | Give the source of funding and the role of the funders for the present study and, if applicable, for the original study on which the present article is based | Funding                                                    |

---
